# Supplementary material for: Negative Effects of Copper Oxide Nanoparticles on Carbon and Nitrogen Cycle Microbial Activities in Contrasting Agricultural Soils and in Presence of Plants
Source: Front Microbiol. 2018 Dec 13;9:3102. doi: 10.3389/fmicb.2018.03102 (PMC6301197; doi:10.3389/fmicb.2018.03102)
Supplement: Supplementary file 1 [file Table_1.DOCX]

**SUPPLEMENTARY INFORMATION**

**Negative Effects of Copper Oxide Nanoparticles on Carbon and Nitrogen Cycle Microbial Activities in Contrasting Agricultural Soils and in Presence of Plants**

**Marie Simonin1,2,3, Amélie A.M. Cantarel1,2,3, Armelle Crouzet1,2,3, Jonathan Gervaix1,2,3, Jean M.F. Martins4, Agnès Richaume1,2,3**

1Université de Lyon, Lyon, France

2Université Claude Bernard Lyon 1, Villeurbanne, France

3CNRS, UMR 5557, Microbial Ecology Centre, Université Lyon 1, Villeurbanne, France

4Université Grenoble Alpes, CNRS, IRD, IGE, Grenoble, France

*** Correspondence:**Marie Simonin
simonin.marie@gmail.com

**Keywords:** Metal-oxide nanomaterials, Agro-ecosystem, Microbial Ecotoxicology, Wheat, Nitrification, Denitrification, Soil respiration, Plant-Microorganism interactions


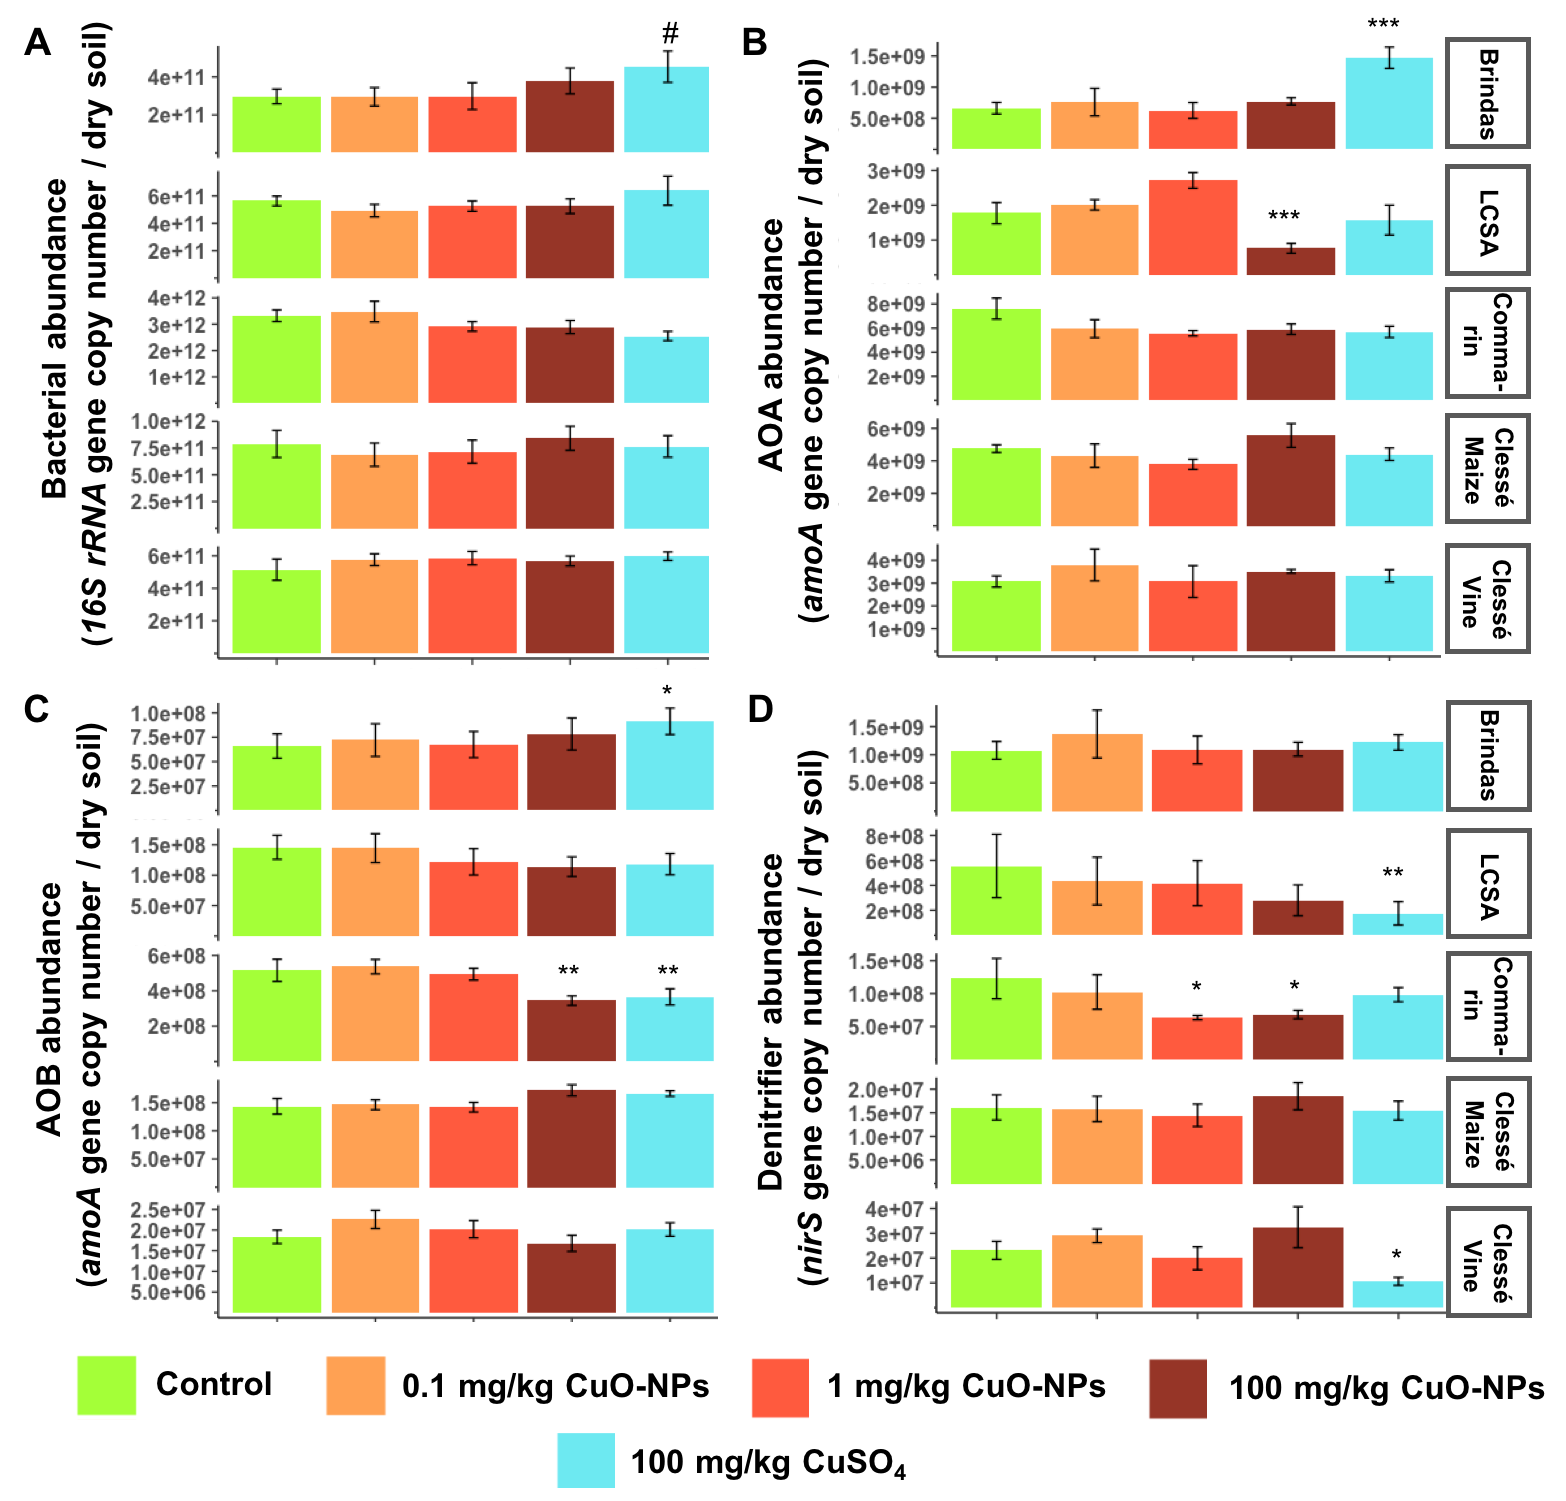


Figure S1: Effects of the treatments on microbial abundances: A) Bacterial abundance, B) AOA abundance, C) AOB abundance and D) Denitrifier abundance. The asterisks represent the significant effects of the treatments compared to the controls: #, *P*<0.1; *, *P*<0.05; **, *P*<0.01; ***, *P*<0.001. Note that the scale of the y-axes is different for each soil.
